# Supplementary material for: The differential effects of isoflurane and sevoflurane on neonatal mice
Source: PubMed Central journal article supplement (PMC7652873; doi:10.1038/s41598-020-76147-6), 2020-11-09
Supplement: 41598_2020_76147_MOESM1_ESM.pdf [file 41598_2020_76147_MOESM1_ESM.pdf]

# The differential effects of isoflurane and sevoflurane on neonatal mice

Shuai Zhao, PhD<sup>1#</sup>, Ziqi Fan, MD<sup>1#</sup>, Jing Hu, MD<sup>1</sup>, Yueli Zhu, MD<sup>1</sup>, Caixiu Lin, MD<sup>1,2</sup>, Ting Shen, PhD<sup>1</sup>, Zheyu Li, MD<sup>1</sup>, Kaicheng Li, PhD<sup>1</sup>, Zhirong Liu, MD, PhD<sup>1</sup>, Yanxing Chen, MD, PhD<sup>1\*</sup>, Baorong Zhang, MD<sup>1\*</sup>

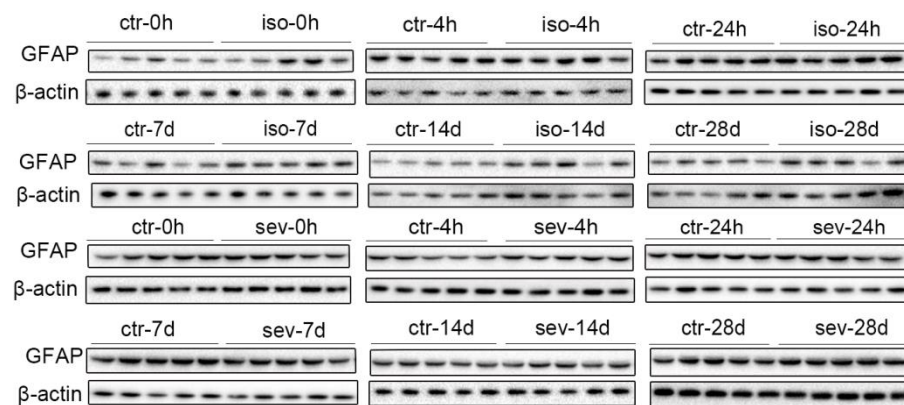

**Supplementary Figure 1. Effects of Isoflurane and Sevoflurane on Astroglial Markers.** Brain homogenates from neonatal mice sacrificed at 0h, 4h, 24h, 7d, 14d and 28d after anesthesia exposure were analyzed by Western blotting developed with antibodies against GFAP and β-actin. Full-length blots are presented in Supplementary Figure 7. n=5 per group. Ctr (control), iso (isoflurane), sev (sevoflurane).

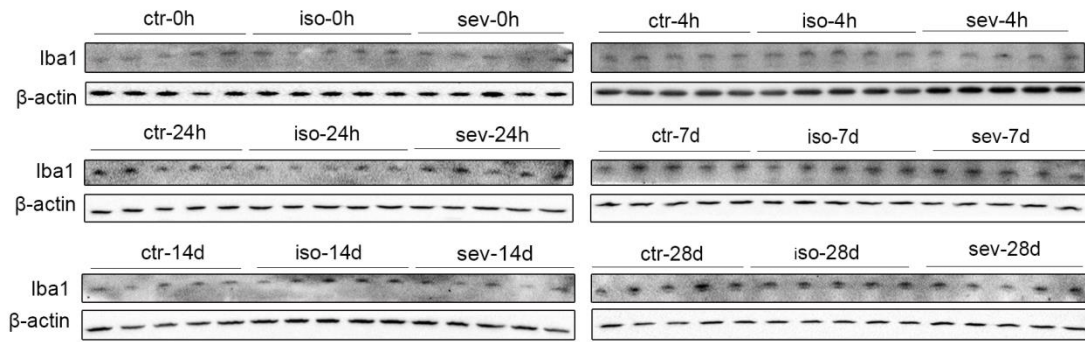

**Supplementary Figure 2. Effects of Isoflurane and Sevoflurane on Microglial Markers.** Brain homogenates from neonatal mice sacrificed at 0h, 4h, 24h, 7d, 14d and 28d after anesthesia exposure were analyzed by Western blotting developed with antibodies against Iba1 and  $\beta$ -actin. Full-length blots are presented in Supplementary Figure 8. n=5 per group. Ctr (control), iso (isoflurane), sev (sevoflurane).

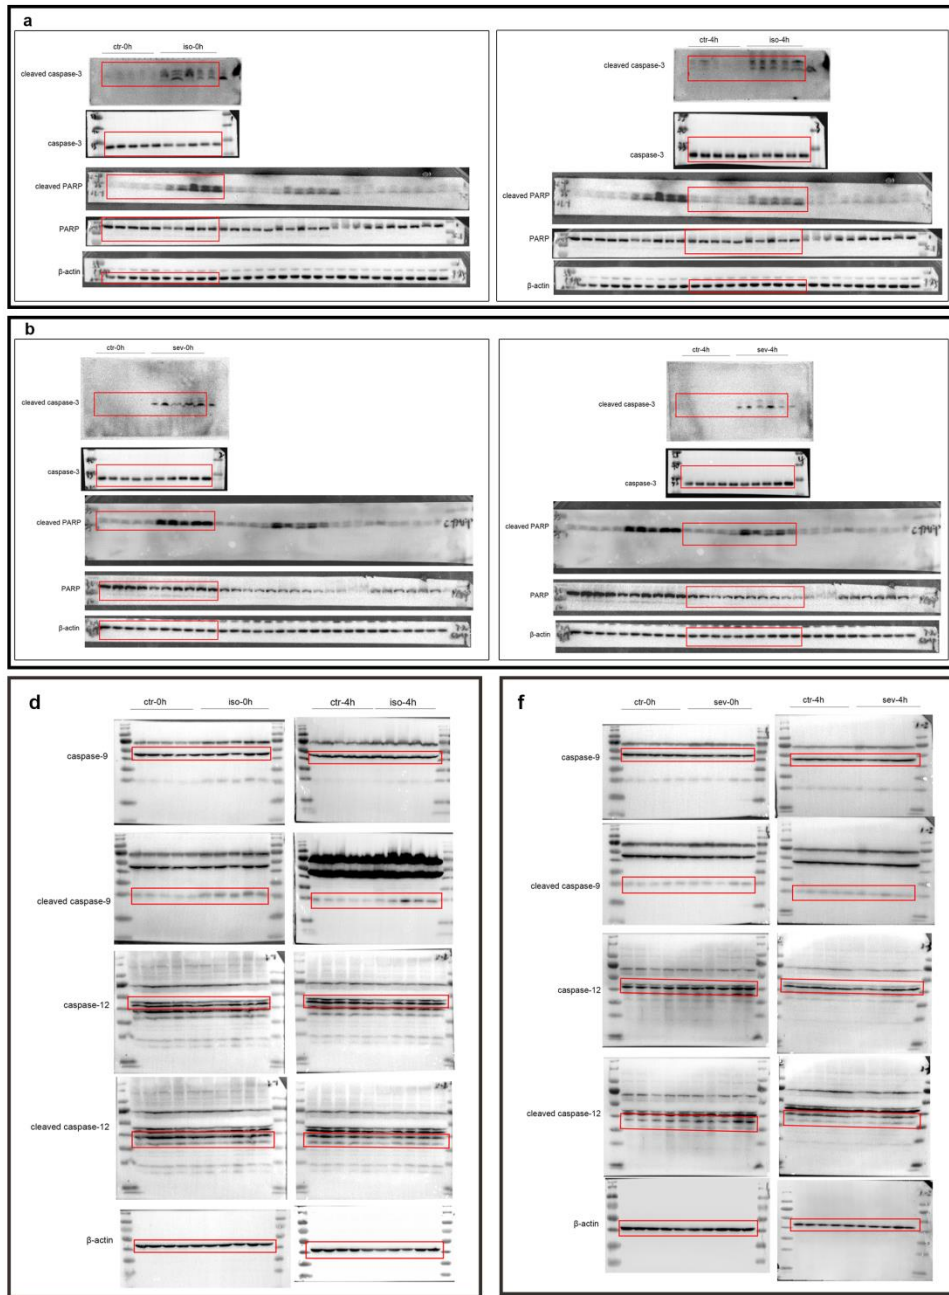

**Supplementary Figure 3.** Original, unprocessed blots of Fig. 1a (a), Fig. 1b (b), Fig. 1d (d) and Fig. 1f (f).

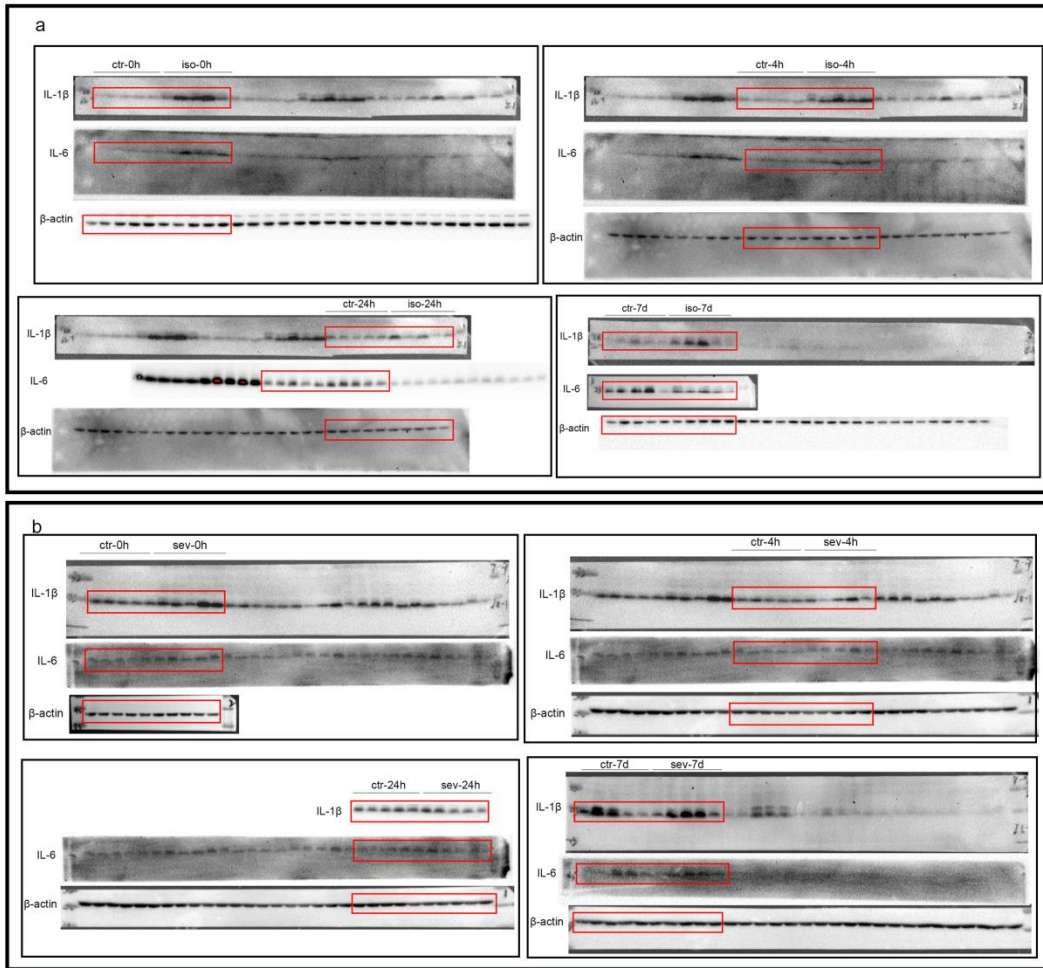

**Supplementary Figure 4.** Original, unprocessed blots of Fig. 2a (a) and Fig. 2b (b)

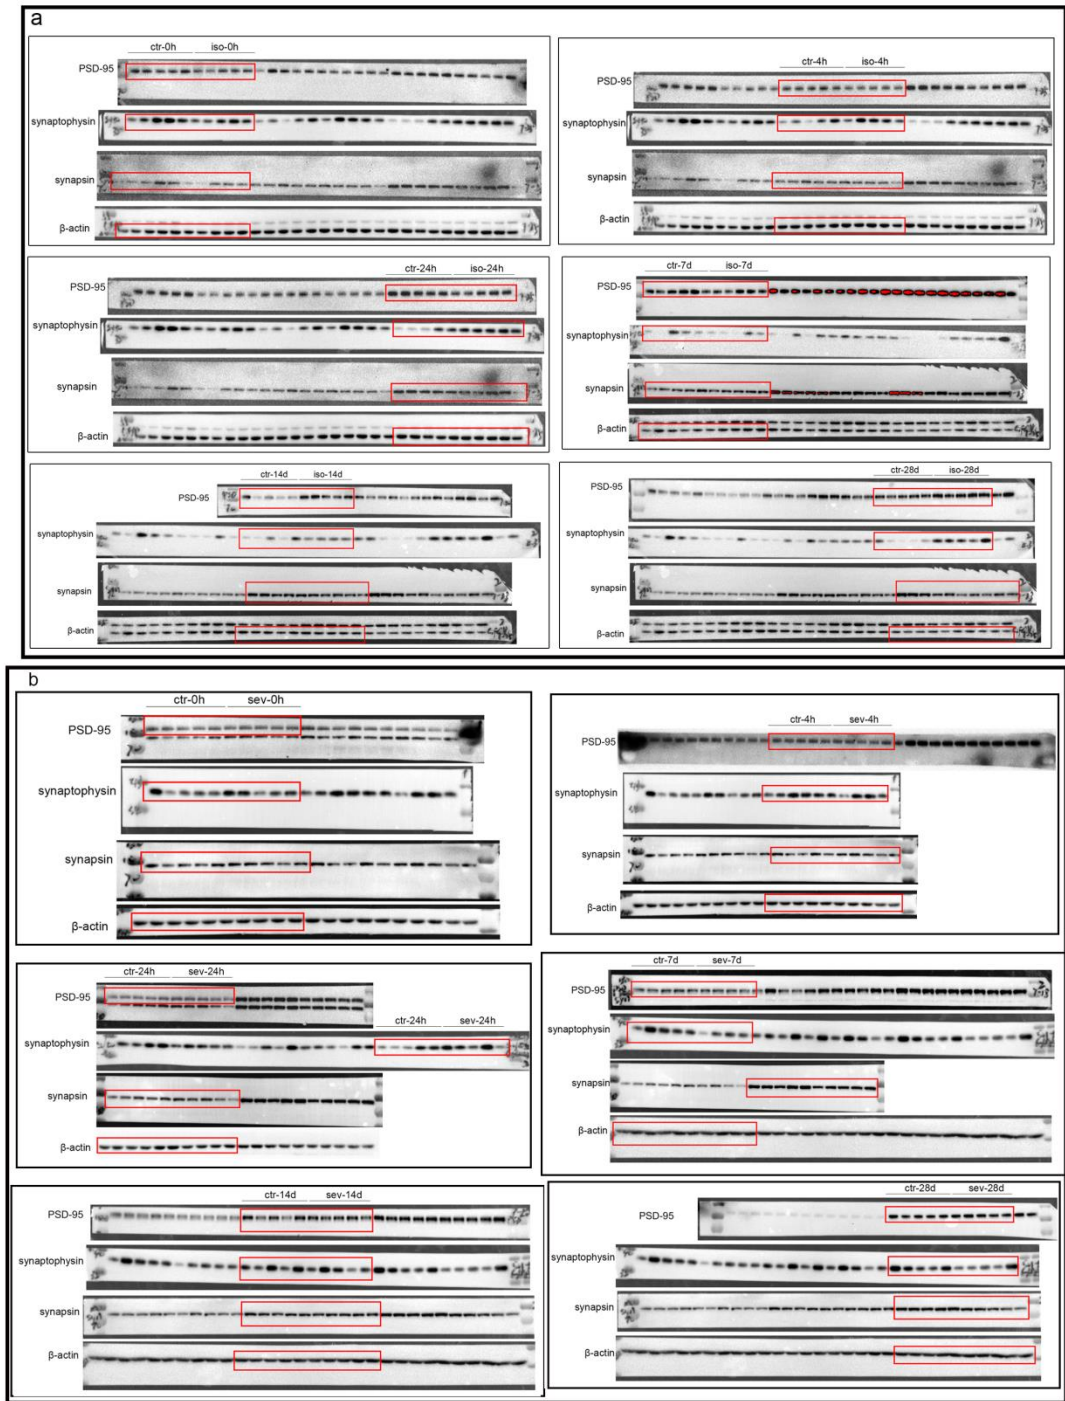

**Supplementary Figure 5.** Original, unprocessed blots of Fig. 3a (a) and Fig. 3b (b)



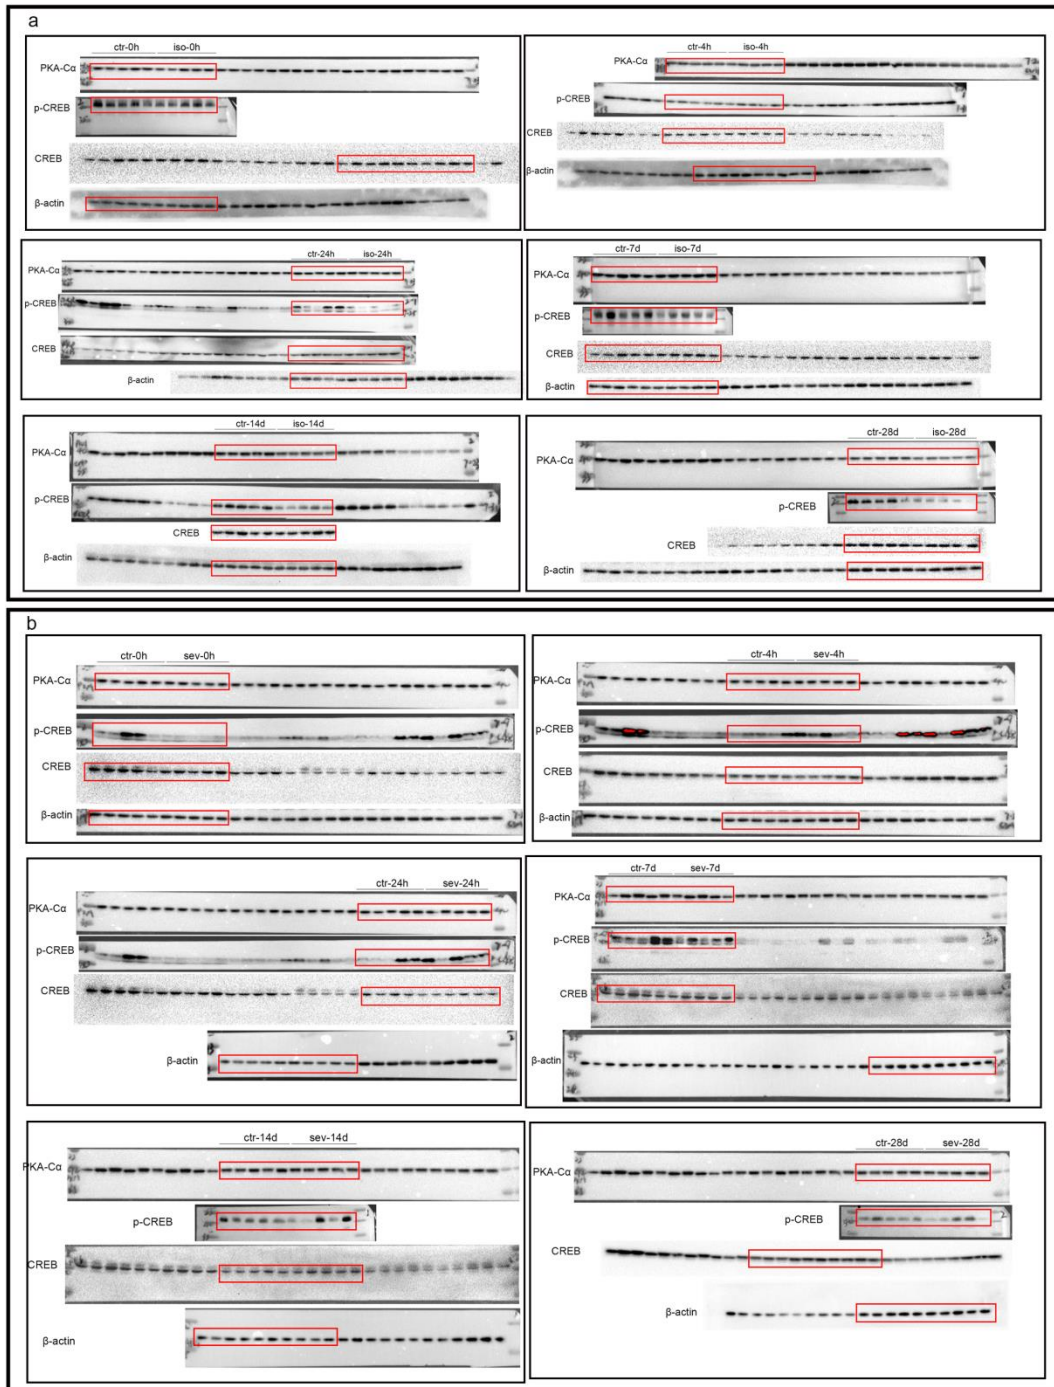

**Supplementary Figure 6.** Original, unprocessed blots of Fig. 5a (a) and Fig. 5b (b)

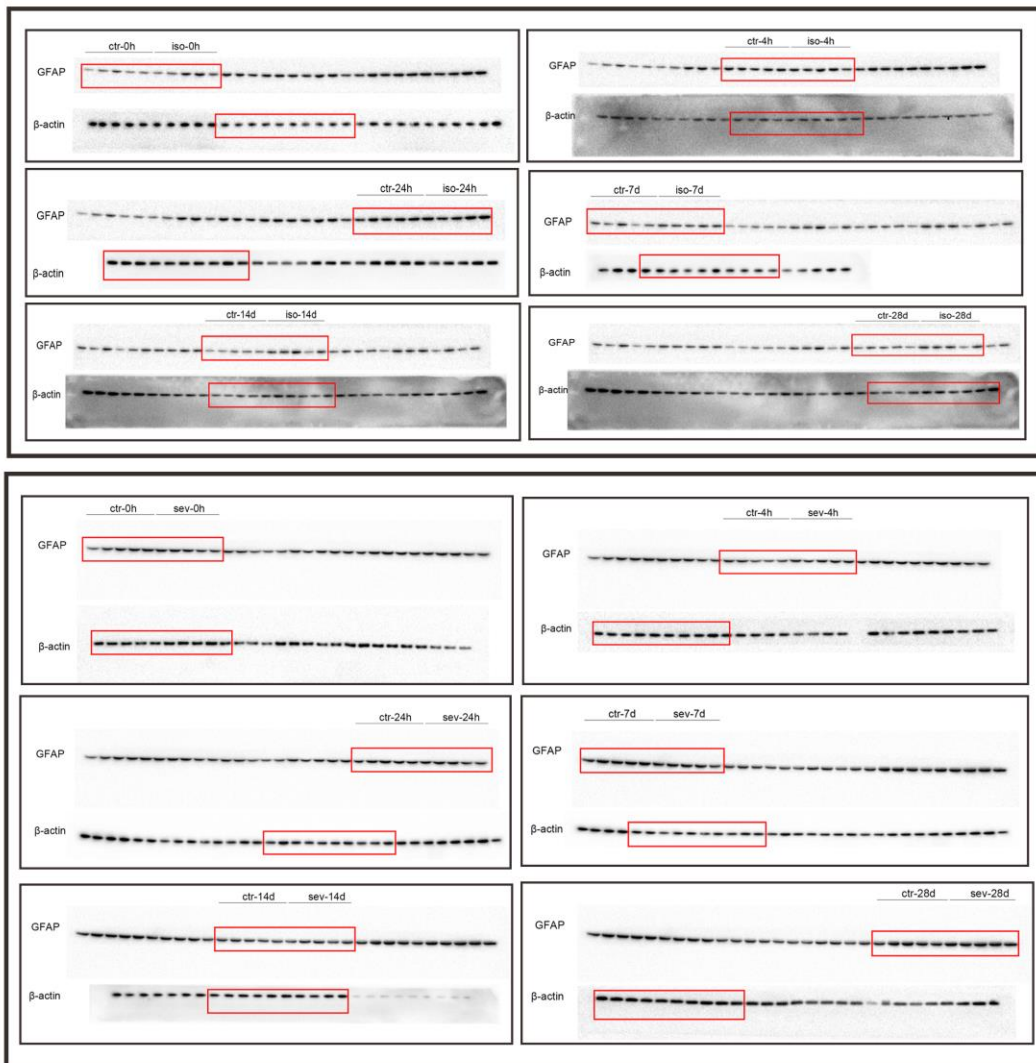

**Supplementary Figure 7.** Original, unprocessed blots of Supplementary Fig. 1

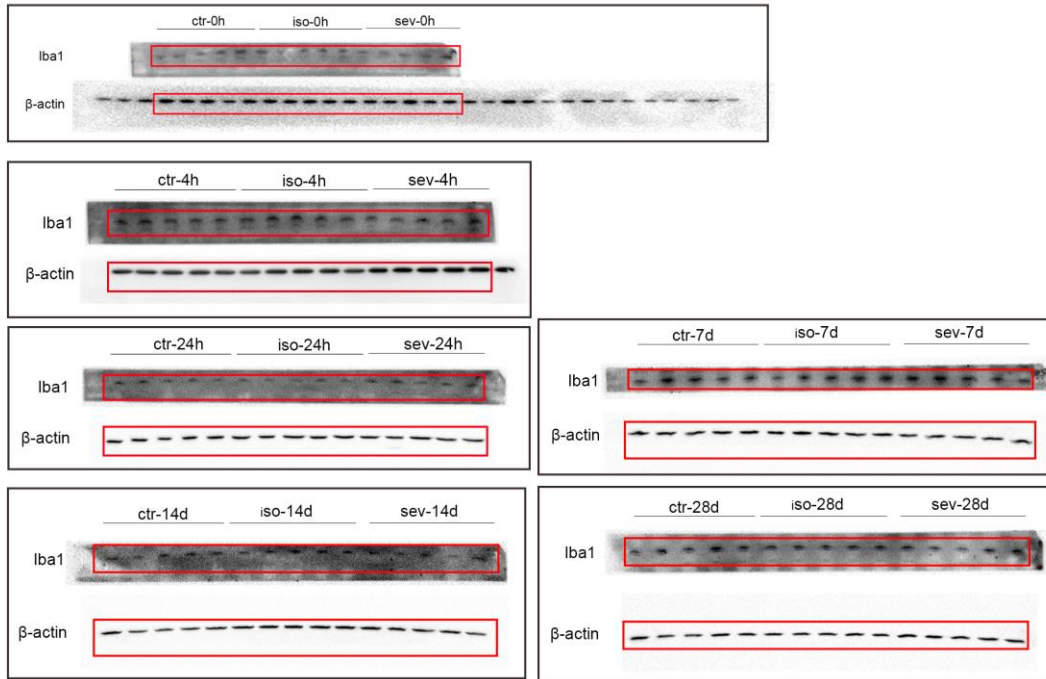

**Supplementary Figure 8.** Original, unprocessed blots of Supplementary Fig. 2
